# Supplementary material for: Middle-Late Triassic insect radiation revealed by diverse fossils and isotopic ages from China
Source: PubMed Central journal article supplement — Sci Adv. 2018 Sep 5;4(9):eaat1380. doi: 10.1126/sciadv.aat1380 (PMC6124916; doi:10.1126/sciadv.aat1380), 2018-09-05
Supplement: aat1380_SM.pdf [file aat1380_SM.pdf]

## Supplementary Materials for

### **Middle-Late Triassic insect radiation revealed by diverse fossils and isotopic ages from China**

Daran Zheng, Su-Chin Chang\*, He Wang, Yan Fang, Jun Wang, Chongqing Feng, Guwei Xie, Edmund A. Jarzembowski, Haichun Zhang, Bo Wang\*

\*Corresponding author. Email: suchin@hku.hk (S.-C.C.); bowang@nigpas.ac.cn (B.W.)

Published 5 September 2018, *Sci. Adv.* **4**, eaat1380 (2018)  
DOI: 10.1126/sciadv.aat1380

#### **This PDF file includes:**

Supplementary Materials and Methods

Fig. S1. Photographs showing outcrops bearing Tongchuan and Karamay entomofaunas.

Table S1. Insect list of the Tongchuan entomofauna.

Table S2. U-Pb analytical results for samples from the Tongchuan outcrop.

References (67–80)

## Supplementary Materials and Methods

### Stratigraphic information

The Tongchuan Formation conformably underlies the Upper Triassic Yanchang Formation and overlies the Lower-Middle Triassic Ermaying Formation in the Tongchuan outcrop. The fossil-bearing layer of the Tongchuan Formation is a series of greyish green sandstones, interbedded with shale and mudstone (fig. S1a), yielding bivalves, spinicaudatans, ostracods, insects, tadpole shrimps, fishes, reptiles, chrysophyte cysts, sporopollen, and plants (67–69). Approximately 30 insect families in 11 orders, including Blattodea, Coleoptera, Diptera, Grylloblattida, Glosselytrodea, Hemiptera, Mecoptera, Miomoptera, Odonatoptera, Orthoptera, and Trichoptera, are herein recorded (table S1). The lower part of the Tongchuan Formation is considered to be Anisian-Ladinian in age, and the upper part is considered to be Carnian (this paper). It should be noted that there are some earlier studies of the insects from the same section (e.g., 70, 71); nearly all the earlier attributions, however, were questionable and the studied specimens are not accessible. Thus, we did not consider these earlier data but based on our collections.

The upper part of the Karamay Formation conformably underlies the Upper Triassic Baijiantan Formation and unconformably overlies the Paleozoic granite in the Huayuangou outcrop. The fossil-bearing layer of the Karamay Formation is composed of yellow mudstone (fig. S1b), yielding kazacharthrans, insects, sporopollen and plants (72). Approximately 10 insect families in six orders, including Blattaria, Coleoptera, Hemiptera, Mecoptera, Odonata, and Trichoptera, have been found. Based on diverse biostratigraphical work on both the surface and subsurface in the northwestern Junggar Basin, the age of the Karamay Formation is considered to be late

Middle to Late Triassic for the lower part, and Late Triassic for the upper part (72). The upper part is probably Carnian in age based on the megaspore fossils (72, 73).

### **Previous geochronology of the Tongchuan Formation**

The Triassic in the Ordos Basin contains abundant tuff or tuffaceous sandstone, especially in the Middle Triassic Tongchuan Formation (74). In previous geochronological studies, some radioisotopic results were obtained from both surface and subsurface specimens (30, 75–77). Liu *et al.* (77) obtained a weighted mean age of  $243.1 \pm 3.9$  Ma for the lower part of the Tongchuan Formation and ages of  $234.6 \pm 6.5$  Ma to  $238.6 \pm 2.6$  Ma for the upper part based on SHRIMP U-Pb dating of tuffs. However, the ages with a mean value of  $234.6 \pm 6.5$  Ma are scattered and not concordant; consequently, they do not reliably represent the real depositional ages of the strata. The ages with a weighted mean of  $238.6 \pm 2.6$  Ma are slightly concordant but also scattered. Zhang *et al.* (30) obtained an age range between  $234.3 \pm 2.8$  Ma and  $236.1 \pm 2.7$  Ma for the Chang-7 Member (upper part of the Tongchuan Formation; 79) using ICP-MS U-Pb dating on tuff samples, reflecting a Carnian age. Wang *et al.* (76) obtained a range of 241.3–239.7 Ma for the lower part of the Chang-7 Member based on using SHRIMP U-Pb analyses of two tuff samples. According to the data, these ages are concordant but scattered, and two concordant age ranges, 246–227 Ma and 246–229 Ma, were obtained for these samples. However, Wang *et al.* (76) subjectively selected the older age range of 241–239 Ma as the depositional age based on the assumption that the specimens were mixed with younger zircons. This explanation is obviously unreliable, and the absolute age of the tuff should be within the youngest range of 229–227 Ma, indicating a Late Triassic age (Carnian). Therefore, the previous dating actually indicates a Carnian age for the base of the upper part of the Tongchuan Formation.

### **Biostratigraphic age of the Tongchuan Formation**

Recent paleontological work indicated a Middle–Late Triassic age for the Tongchuan Formation (69, 77). Deng *et al.* (77) identified the obvious differences in the sporopollen assemblages between the two parts of the Tongchuan Formation: the assemblage from the lower part resembles that from the Lower Triassic Zifang Formation, reflecting a Middle Triassic age, while the upper part bears abundant Late Triassic elements, which is consistent with other sporopollen results based on samples from different areas in the Ordos Basin (78–80). An early Late Triassic age for the upper part was also supported by the presence of the reptile *Yonghesuchus sangbiensis* (80). The Tongchuan entomofauna was recently considered to be Ladinian in age (69). In conclusion, paleontological evidence indicates a Middle Triassic age for the lower part of the Tongchuan Formation, and a Late Triassic age for the upper part.

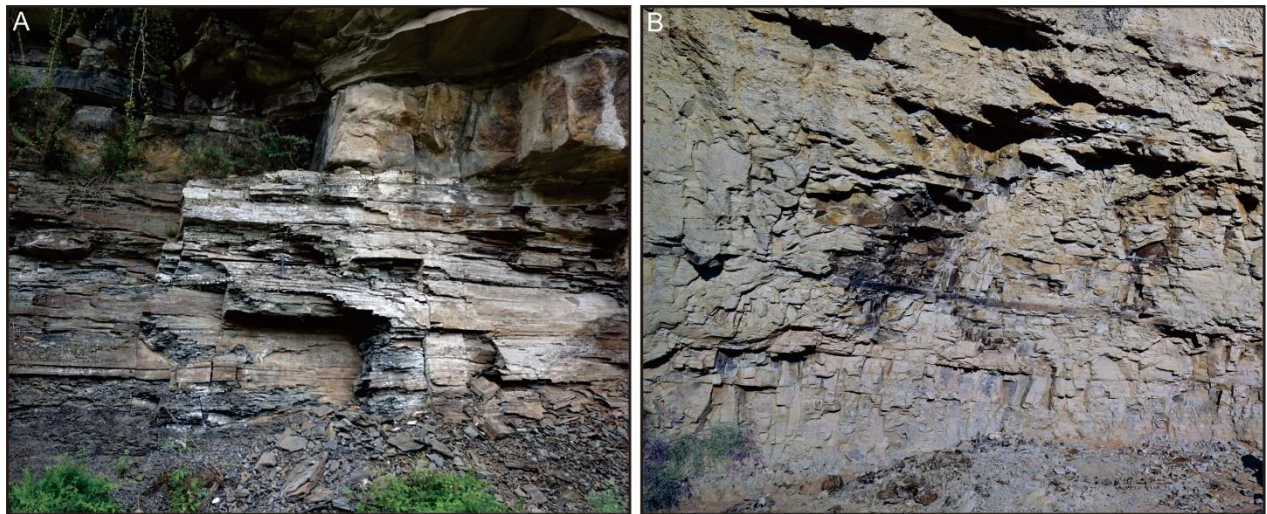

**Fig. S1. Photographs showing outcrops bearing Tongchuan and Karamay entomofaunas.**

Photo Credit: Daran Zheng, The University of Hong Kong

**Table S1. Insect list of the Tongchuan entomofauna.**

| Order          | Family                                                                                                                                         |
|----------------|------------------------------------------------------------------------------------------------------------------------------------------------|
| Odonatoptera   | Zygophlebiidae                                                                                                                                 |
| Blattodea      | Mylacridae                                                                                                                                     |
| Grylloblattida | Chaulioditidae                                                                                                                                 |
| Orthoptera     | Locustavidae                                                                                                                                   |
| Hemiptera      | Dracaphididae, Suriyokocixiidae, Curvicubitidae, Scytinopteridae, Ipsviciidae, Dunstaniidae, Hylicellidae,<br>Progonocimicidae (Cicadocorinae) |
| Glosselytrodea | Jurinidae                                                                                                                                      |
| Miomoptera     | Permosialidae                                                                                                                                  |
| Mecoptera      | Mesopsychidae, Pseudopolycentropodidae, Parachoristidae, Thaumatomeropidae, Permochoristidae                                                   |
| Diptera        | Vladipteridae                                                                                                                                  |
| Trichoptera    | Families uncertain (earliest caddisfly case)                                                                                                   |
| Coleoptera     | Cupedidae, Ademosynidae, Schizophoridae, Tricoleidae, Adephaga (families uncertain), Staphylinidae,<br>other Polyphaga (families uncertain)    |

**Table S2. U-Pb analytical results for samples from the Tongchuan outcrop.**

| Samples                                       | Isotopic ratios |                                   |               |                                  |               |                                  | U-Pb Ages(Ma) |                                   |               |                                  |               |                                  |               |
|-----------------------------------------------|-----------------|-----------------------------------|---------------|----------------------------------|---------------|----------------------------------|---------------|-----------------------------------|---------------|----------------------------------|---------------|----------------------------------|---------------|
|                                               | Th/U            | $^{207}\text{Pb}/^{206}\text{Pb}$ | $\pm 1\sigma$ | $^{207}\text{Pb}/^{235}\text{U}$ | $\pm 1\sigma$ | $^{206}\text{Pb}/^{238}\text{U}$ | $\pm 1\sigma$ | $^{207}\text{Pb}/^{206}\text{Pb}$ | $\pm 1\sigma$ | $^{207}\text{Pb}/^{235}\text{U}$ | $\pm 1\sigma$ | $^{206}\text{Pb}/^{238}\text{U}$ | $\pm 1\sigma$ |
| <b>TC-01, gray-green tuffaceous sandstone</b> |                 |                                   |               |                                  |               |                                  |               |                                   |               |                                  |               |                                  |               |
| 91500                                         | 0.35052         | 0.07491                           | 0.0002        | 1.85649                          | 0.0089        | 0.17969                          | 0.0007        | 1066                              | 6             | 1066                             | 3             | 1065                             | 4             |
| 91500                                         | 0.34648         | 0.07509                           | 0.0002        | 1.8583                           | 0.0086        | 0.17949                          | 0.0008        | 1072                              | 6             | 1066                             | 3             | 1064                             | 4             |
| 91500                                         | 0.34383         | 0.07464                           | 0.0002        | 1.83581                          | 0.0097        | 0.17834                          | 0.0008        | 1059                              | 6             | 1058                             | 3             | 1058                             | 4             |
| GJ                                            | 0.03289         | 0.05976                           | 0.0001        | 0.81597                          | 0.0048        | 0.099                            | 0.0005        | 594                               | 10            | 606                              | 3             | 609                              | 3             |
| GJ                                            | 0.03309         | 0.05999                           | 0.0002        | 0.81245                          | 0.0041        | 0.09821                          | 0.0005        | 611                               | 6             | 604                              | 2             | 604                              | 3             |
| NIST                                          | 0.98777         | 0.90425                           | 0.0017        | 33.683                           | 0.136         | 0.2701                           | 0.0010        |                                   |               | 3601                             | 4             | 1541                             | 5             |
| TC-01-1                                       | 0.83034         | 0.05246                           | 0.0012        | 0.36302                          | 0.0081        | 0.05018                          | 0.0003        | 306                               | 54            | 314                              | 6             | 316                              | 2             |
| TC-01-2                                       | 0.70787         | 0.05118                           | 0.0004        | 0.26423                          | 0.0023        | 0.03745                          | 0.0002        | 249                               | 10            | 238                              | 2             | 237                              | 1             |
| TC-01-3                                       | 1.02226         | 0.05328                           | 0.0002        | 0.29243                          | 0.0017        | 0.03983                          | 0.0003        | 341                               | 6             | 260                              | 1             | 237                              | 2             |
| TC-01-4                                       | 0.62527         | 0.05234                           | 0.0003        | 0.28215                          | 0.002         | 0.0391                           | 0.0002        | 300                               | 7             | 252                              | 2             | 247                              | 1             |
| TC-01-5                                       | 1.59265         | 0.05321                           | 0.0003        | 0.29095                          | 0.0018        | 0.03965                          | 0.0002        | 338                               | 7             | 259                              | 1             | 251                              | 1             |
| TC-01-6                                       | 1.06092         | 0.10783                           | 0.0014        | 4.42742                          | 0.0514        | 0.29779                          | 0.0015        | 1763                              | 24            | 1717                             | 10            | 1680                             | 8             |
| TC-01-7                                       | 0.59142         | 0.05163                           | 0.0002        | 0.28702                          | 0.0017        | 0.04031                          | 0.0002        | 269                               | 6             | 256                              | 1             | 255                              | 1             |
| TC-01-8                                       | 0.7197          | 0.05144                           | 0.0002        | 0.26535                          | 0.0021        | 0.0374                           | 0.0003        | 261                               | 8             | 239                              | 2             | 237                              | 2             |

|          |         |         |        |         |        |         |        |      |    |      |    |      |    |
|----------|---------|---------|--------|---------|--------|---------|--------|------|----|------|----|------|----|
| TC-01-9  | 0.96614 | 0.05444 | 0.0003 | 0.43422 | 0.0031 | 0.05783 | 0.0002 | 389  | 10 | 366  | 2  | 362  | 1  |
| TC-01-10 | 0.73722 | 0.10916 | 0.0024 | 4.50988 | 0.0857 | 0.29964 | 0.0035 | 1785 | 41 | 1733 | 16 | 1690 | 17 |
| TC-01-11 | 0.54098 | 0.0515  | 0.0012 | 0.27278 | 0.006  | 0.03841 | 0.0003 | 263  | 54 | 245  | 5  | 243  | 2  |
| TC-01-12 | 1.31117 | 0.05239 | 0.0004 | 0.27767 | 0.0029 | 0.03844 | 0.0003 | 302  | 12 | 249  | 2  | 243  | 2  |
| TC-01-13 | 1.39648 | 0.05861 | 0.0026 | 0.36145 | 0.0159 | 0.04472 | 0.0003 | 553  | 99 | 313  | 12 | 282  | 2  |
| TC-01-14 | 0.30825 | 0.11469 | 0.0003 | 5.04023 | 0.0296 | 0.31863 | 0.0018 | 1875 | 5  | 1826 | 5  | 1783 | 9  |
| TC-01-15 | 2.20103 | 0.06086 | 0.0004 | 0.33484 | 0.0024 | 0.03992 | 0.0002 | 634  | 8  | 293  | 2  | 252  | 1  |
| 91500    | 0.34222 | 0.07477 | 0.0003 | 1.84361 | 0.0102 | 0.17882 | 0.0008 | 1062 | 9  | 1061 | 4  | 1061 | 4  |
| 91500    | 0.35175 | 0.07499 | 0.0003 | 1.85679 | 0.0102 | 0.17952 | 0.0008 | 1133 | 7  | 1066 | 4  | 1064 | 4  |
| GJ       | 0.02734 | 0.06005 | 0.0002 | 0.82076 | 0.0046 | 0.0991  | 0.0005 | 606  | 7  | 608  | 3  | 609  | 3  |
| GJ       | 0.03293 | 0.06001 | 0.0002 | 0.81685 | 0.0039 | 0.09871 | 0.0004 | 606  | 6  | 606  | 2  | 607  | 2  |
| TC-01-16 | 0.41546 | 0.14456 | 0.0025 | 3.0967  | 0.0458 | 0.15537 | 0.0013 | 2283 | 30 | 1432 | 11 | 931  | 7  |
| TC-01-17 | 0.84557 | 0.05488 | 0.0003 | 0.2895  | 0.0023 | 0.03823 | 0.0002 | 407  | 10 | 258  | 2  | 242  | 1  |
| TC-01-18 | 0.30206 | 0.16402 | 0.0005 | 9.8276  | 0.0556 | 0.43443 | 0.0023 | 2498 | 4  | 2419 | 5  | 2326 | 10 |
| TC-01-19 | 0.94539 | 0.1646  | 0.0003 | 10.6517 | 0.0757 | 0.46918 | 0.0031 | 2503 | 5  | 2493 | 7  | 2480 | 14 |
| TC-01-20 | 1.38182 | 0.10505 | 0.0016 | 4.13034 | 0.0587 | 0.28515 | 0.0014 | 1715 | 28 | 1660 | 12 | 1617 | 7  |
| TC-01-21 | 0.56959 | 0.15187 | 0.0004 | 9.10984 | 0.0627 | 0.4348  | 0.0024 | 2367 | 5  | 2349 | 6  | 2327 | 11 |
| TC-01-22 | 0.70594 | 0.18173 | 0.0005 | 5.49274 | 0.0251 | 0.21919 | 0.0012 | 2669 | 4  | 1899 | 4  | 1278 | 7  |

|          |         |         |        |         |        |         |        |      |    |      |    |      |    |
|----------|---------|---------|--------|---------|--------|---------|--------|------|----|------|----|------|----|
| TC-01-23 | 0.54344 | 0.05532 | 0.0007 | 0.32088 | 0.0036 | 0.04209 | 0.0003 | 425  | 14 | 283  | 3  | 266  | 2  |
| TC-01-24 | 0.68196 | 0.05208 | 0.0012 | 0.30309 | 0.0065 | 0.04221 | 0.0003 | 289  | 52 | 269  | 5  | 266  | 2  |
| TC-01-25 | 0.66805 | 0.05315 | 0.0002 | 0.33843 | 0.0025 | 0.04619 | 0.0004 | 335  | 8  | 296  | 2  | 291  | 2  |
| TC-01-26 | 0.64366 | 0.10194 | 0.0002 | 4.15029 | 0.0252 | 0.29508 | 0.0015 | 1660 | 5  | 1664 | 5  | 1667 | 7  |
| TC-01-27 | 1.17478 | 0.05175 | 0.0005 | 0.27076 | 0.0026 | 0.03795 | 0.0002 | 274  | 11 | 243  | 2  | 240  | 1  |
| TC-01-28 | 0.56847 | 0.05833 | 0.0004 | 0.37331 | 0.0026 | 0.04651 | 0.0004 | 542  | 7  | 322  | 2  | 293  | 2  |
| TC-01-29 | 1.12458 | 0.05248 | 0.0005 | 0.29063 | 0.0033 | 0.04018 | 0.0003 | 306  | 13 | 259  | 3  | 254  | 2  |
| TC-01-30 | 0.52436 | 0.10856 | 0.0004 | 5.02669 | 0.0355 | 0.33593 | 0.0025 | 1775 | 6  | 1824 | 6  | 1867 | 12 |
| 91500    | 0.34207 | 0.07478 | 0.0003 | 1.84947 | 0.0098 | 0.17935 | 0.0007 | 1063 | 9  | 1063 | 4  | 1063 | 4  |
| 91500    | 0.35191 | 0.07498 | 0.0003 | 1.85093 | 0.0104 | 0.17899 | 0.0008 | 1133 | 7  | 1064 | 4  | 1061 | 4  |
| GJ       | 0.02818 | 0.06029 | 0.0002 | 0.81668 | 0.0039 | 0.09821 | 0.0003 | 613  | 7  | 606  | 2  | 604  | 2  |
| GJ       | 0.0326  | 0.06034 | 0.0002 | 0.82136 | 0.0037 | 0.0987  | 0.0003 | 617  | 12 | 609  | 2  | 607  | 2  |
| TC-01-31 | 0.8368  | 0.09849 | 0.0024 | 3.66022 | 0.0813 | 0.26955 | 0.0027 | 1596 | 47 | 1563 | 18 | 1538 | 14 |
| TC-01-32 | 0.76627 | 0.05369 | 0.0003 | 0.34104 | 0.0033 | 0.04607 | 0.0004 | 358  | 10 | 298  | 3  | 290  | 2  |
| TC-01-33 | 0.64298 | 0.05265 | 0.0003 | 0.32498 | 0.0027 | 0.04478 | 0.0003 | 314  | 8  | 286  | 2  | 282  | 2  |
| TC-01-34 | 0.88099 | 0.10724 | 0.0004 | 4.62699 | 0.0415 | 0.31284 | 0.0026 | 1753 | 7  | 1754 | 7  | 1755 | 13 |
| TC-01-35 | 0.74437 | 0.05218 | 0.0003 | 0.27567 | 0.0019 | 0.03831 | 0.0002 | 293  | 7  | 247  | 2  | 242  | 1  |
| TC-01-36 | 0.74064 | 0.05377 | 0.0004 | 0.37679 | 0.0032 | 0.05082 | 0.0002 | 361  | 11 | 325  | 2  | 320  | 1  |



|          |         |         |        |         |        |         |        |      |    |      |   |      |    |
|----------|---------|---------|--------|---------|--------|---------|--------|------|----|------|---|------|----|
| TC-01-37 | 0.35524 | 0.05633 | 0.001  | 0.31123 | 0.0051 | 0.04007 | 0.0002 | 465  | 38 | 275  | 4 | 253  | 1  |
| TC-01-38 | 0.6481  | 0.14834 | 0.0016 | 6.44191 | 0.06   | 0.31496 | 0.0018 | 2327 | 19 | 2038 | 8 | 1765 | 9  |
| TC-01-39 | 1.08716 | 0.05423 | 0.0008 | 0.34439 | 0.0034 | 0.04607 | 0.0006 | 381  | 13 | 300  | 3 | 290  | 3  |
| TC-01-40 | 1.09438 | 0.05506 | 0.0005 | 0.311   | 0.0033 | 0.04096 | 0.0002 | 414  | 14 | 275  | 3 | 259  | 1  |
| TC-01-41 | 0.99788 | 0.0555  | 0.0006 | 0.35831 | 0.0062 | 0.04678 | 0.0006 | 432  | 18 | 311  | 5 | 295  | 4  |
| TC-01-42 | 0.56934 | 0.16778 | 0.0017 | 10.0292 | 0.0855 | 0.43354 | 0.0023 | 2536 | 17 | 2437 | 8 | 2322 | 10 |
| TC-01-43 | 0.69691 | 0.05259 | 0.0002 | 0.32585 | 0.0024 | 0.04504 | 0.0004 | 311  | 9  | 286  | 2 | 284  | 2  |
| TC-01-44 | 1.0225  | 0.05295 | 0.0004 | 0.29585 | 0.0023 | 0.04058 | 0.0003 | 327  | 8  | 263  | 2 | 256  | 2  |
| TC-01-45 | 1.16842 | 0.05328 | 0.0003 | 0.34583 | 0.003  | 0.04721 | 0.0005 | 341  | 11 | 302  | 2 | 297  | 3  |
| 91500    | 0.33821 | 0.07485 | 0.0003 | 1.848   | 0.01   | 0.17904 | 0.0008 | 1065 | 7  | 1063 | 4 | 1062 | 5  |
| 91500    | 0.35609 | 0.07491 | 0.0003 | 1.8524  | 0.0105 | 0.1793  | 0.0008 | 1066 | 8  | 1064 | 4 | 1063 | 4  |
| GJ       | 0.02981 | 0.06025 | 0.0002 | 0.81803 | 0.0035 | 0.09844 | 0.0003 | 613  | 7  | 607  | 2 | 605  | 2  |
| GJ       | 0.03356 | 0.06015 | 0.0002 | 0.81357 | 0.0037 | 0.09807 | 0.0003 | 609  | 3  | 604  | 2 | 603  | 2  |
| TC-01-46 | 1.2764  | 0.05094 | 0.0003 | 0.2628  | 0.0025 | 0.0374  | 0.0003 | 238  | 10 | 237  | 2 | 237  | 2  |
| TC-01-47 | 1.29404 | 0.05189 | 0.0006 | 0.27263 | 0.0038 | 0.0381  | 0.0003 | 281  | 17 | 245  | 3 | 241  | 2  |
| TC-01-48 | 0.53991 | 0.05401 | 0.0003 | 0.34325 | 0.0031 | 0.04609 | 0.0004 | 371  | 9  | 300  | 2 | 290  | 2  |
| TC-01-49 | 0.7663  | 0.05683 | 0.0012 | 0.50682 | 0.0103 | 0.06468 | 0.0004 | 485  | 47 | 416  | 7 | 404  | 2  |
| TC-01-50 | 0.8147  | 0.05307 | 0.0004 | 0.3328  | 0.0027 | 0.04548 | 0.0002 | 332  | 11 | 292  | 2 | 287  | 1  |

|          |         |         |        |         |        |         |        |      |    |      |    |      |    |
|----------|---------|---------|--------|---------|--------|---------|--------|------|----|------|----|------|----|
| TC-01-51 | 1.03372 | 0.05134 | 0.0007 | 0.26448 | 0.0037 | 0.03739 | 0.0002 | 256  | 22 | 238  | 3  | 237  | 1  |
| TC-01-52 | 1.50794 | 0.05274 | 0.0006 | 0.28009 | 0.0034 | 0.03853 | 0.0003 | 318  | 15 | 251  | 3  | 244  | 2  |
| TC-01-53 | 1.15522 | 0.05147 | 0.0006 | 0.2656  | 0.003  | 0.03745 | 0.0003 | 262  | 14 | 239  | 2  | 237  | 2  |
| TC-01-54 | 0.75423 | 0.05379 | 0.0003 | 0.33515 | 0.0023 | 0.04523 | 0.0004 | 362  | 8  | 293  | 2  | 285  | 2  |
| TC-01-55 | 0.32003 | 0.05163 | 0.0003 | 0.28115 | 0.0022 | 0.03949 | 0.0002 | 269  | 9  | 252  | 2  | 250  | 1  |
| TC-01-56 | 0.50285 | 0.16627 | 0.001  | 10.2352 | 0.0461 | 0.44645 | 0.0017 | 2520 | 10 | 2456 | 4  | 2379 | 7  |
| TC-01-57 | 0.91898 | 0.11174 | 0.0015 | 4.66482 | 0.057  | 0.30278 | 0.0017 | 1828 | 25 | 1761 | 10 | 1705 | 8  |
| TC-01-58 | 0.54876 | 0.05166 | 0.0003 | 0.31182 | 0.0031 | 0.04376 | 0.0003 | 270  | 10 | 276  | 2  | 276  | 2  |
| TC-01-59 | 0.89102 | 0.07768 | 0.0005 | 0.42262 | 0.0038 | 0.03943 | 0.0002 | 1139 | 11 | 358  | 3  | 249  | 1  |
| TC-01-60 | 0.55478 | 0.12096 | 0.0003 | 6.05067 | 0.041  | 0.36279 | 0.0025 | 1970 | 6  | 1983 | 6  | 1995 | 12 |
| 91500    | 0.34986 | 0.07467 | 0.0003 | 1.84725 | 0.0112 | 0.17939 | 0.0009 | 1061 | 6  | 1062 | 4  | 1064 | 5  |
| 91500    | 0.34403 | 0.07509 | 0.0002 | 1.85315 | 0.01   | 0.17895 | 0.0008 | 1072 | 6  | 1065 | 4  | 1061 | 4  |
| GJ       | 0.02774 | 0.0601  | 0.0003 | 0.82044 | 0.006  | 0.09897 | 0.0004 | 606  | 13 | 608  | 3  | 608  | 2  |
| GJ       | 0.02989 | 0.05988 | 0.0002 | 0.81595 | 0.0039 | 0.09881 | 0.0004 | 598  | 6  | 606  | 2  | 607  | 2  |
| TC-01-61 | 0.84156 | 0.05303 | 0.0003 | 0.3444  | 0.0026 | 0.04709 | 0.0003 | 330  | 8  | 300  | 2  | 297  | 2  |
| TC-01-62 | 1.18043 | 0.05147 | 0.0005 | 0.2664  | 0.0028 | 0.03753 | 0.0002 | 262  | 13 | 240  | 2  | 237  | 1  |
| TC-01-63 | 0.60822 | 0.14112 | 0.0018 | 6.64541 | 0.0767 | 0.34152 | 0.0020 | 2241 | 23 | 2065 | 10 | 1894 | 10 |
| TC-01-64 | 0.82624 | 0.05416 | 0.001  | 0.37459 | 0.0084 | 0.05011 | 0.0004 | 378  | 36 | 323  | 6  | 315  | 2  |

|          |         |         |        |         |        |         |        |      |     |      |     |      |     |
|----------|---------|---------|--------|---------|--------|---------|--------|------|-----|------|-----|------|-----|
| TC-01-65 | 0.4188  | 0.05185 | 0.0002 | 0.31191 | 0.0021 | 0.04362 | 0.0002 | 279  | 7   | 276  | 2   | 275  | 1   |
| TC-01-66 | 0.1788  | 0.21316 | 0.058  | 10.1811 | 2.2553 | 0.3464  | 0.0548 | 2930 | 518 | 2451 | 205 | 1917 | 262 |
| TC-01-67 | 0.73563 | 0.05482 | 0.0003 | 0.3777  | 0.0025 | 0.04997 | 0.0003 | 405  | 7   | 325  | 2   | 314  | 2   |
| TC-01-68 | 1.52145 | 0.05537 | 0.0005 | 0.34652 | 0.0043 | 0.04534 | 0.0002 | 427  | 18  | 302  | 3   | 286  | 2   |
| TC-01-69 | 0.92672 | 0.0528  | 0.0004 | 0.27663 | 0.0026 | 0.03799 | 0.0002 | 320  | 14  | 248  | 2   | 240  | 1   |
| TC-01-70 | 0.61334 | 0.05942 | 0.0003 | 0.31341 | 0.0022 | 0.03828 | 0.0003 | 583  | 8   | 277  | 2   | 242  | 2   |
| TC-01-71 | 0.71309 | 0.05253 | 0.0004 | 0.32614 | 0.0035 | 0.04505 | 0.0004 | 308  | 11  | 287  | 3   | 284  | 3   |
| TC-01-72 | 0.40291 | 0.05245 | 0.001  | 0.32414 | 0.0052 | 0.04482 | 0.0004 | 305  | 42  | 285  | 4   | 283  | 2   |
| TC-01-73 | 0.91965 | 0.05163 | 0.0008 | 0.30408 | 0.0056 | 0.0427  | 0.0004 | 269  | 25  | 270  | 4   | 270  | 2   |
| TC-01-74 | 0.92075 | 0.12208 | 0.0003 | 5.85881 | 0.0303 | 0.34795 | 0.0016 | 1987 | 4   | 1955 | 4   | 1925 | 7   |
| TC-01-75 | 0.7902  | 0.05163 | 0.0003 | 0.27463 | 0.0016 | 0.03859 | 0.0002 | 269  | 6   | 246  | 1   | 244  | 1   |
| 91500    | 0.34031 | 0.07498 | 0.0003 | 1.85426 | 0.0104 | 0.17934 | 0.0008 | 1133 | 7   | 1065 | 4   | 1063 | 4   |
| 91500    | 0.35379 | 0.07478 | 0.0002 | 1.84614 | 0.0109 | 0.179   | 0.0009 | 1063 | 38  | 1062 | 4   | 1062 | 5   |
| GJ       | 0.02854 | 0.05997 | 0.0002 | 0.81533 | 0.004  | 0.09858 | 0.0004 | 611  | 7   | 605  | 2   | 606  | 2   |
| GJ       | 0.03206 | 0.06018 | 0.0002 | 0.81743 | 0.0039 | 0.0985  | 0.0004 | 609  | 6   | 607  | 2   | 606  | 2   |
| TC-01-76 | 0.4771  | 0.05749 | 0.0002 | 0.60185 | 0.0044 | 0.07594 | 0.0006 | 511  | 7   | 478  | 3   | 472  | 3   |
| TC-01-77 | 1.3001  | 0.0527  | 0.0003 | 0.27284 | 0.0022 | 0.03755 | 0.0002 | 316  | 8   | 245  | 2   | 238  | 1   |
| TC-01-78 | 0.496   | 0.05784 | 0.0003 | 0.63259 | 0.004  | 0.07931 | 0.0004 | 524  | 7   | 498  | 2   | 492  | 2   |

|          |         |         |        |         |        |         |        |      |    |      |   |      |    |
|----------|---------|---------|--------|---------|--------|---------|--------|------|----|------|---|------|----|
| TC-01-79 | 0.82201 | 0.14711 | 0.0011 | 7.37743 | 0.0463 | 0.3637  | 0.0012 | 2313 | 13 | 2158 | 6 | 2000 | 6  |
| TC-01-80 | 0.6918  | 0.0612  | 0.0002 | 0.78667 | 0.0042 | 0.09324 | 0.0006 | 646  | 6  | 589  | 2 | 575  | 3  |
| TC-01-81 | 0.49367 | 0.05315 | 0.0007 | 0.30595 | 0.0036 | 0.04175 | 0.0002 | 335  | 30 | 271  | 3 | 264  | 1  |
| TC-01-82 | 0.49116 | 0.05152 | 0.001  | 0.26586 | 0.0047 | 0.03743 | 0.0004 | 264  | 47 | 239  | 4 | 237  | 2  |
| TC-01-83 | 0.99655 | 0.05781 | 0.0007 | 0.37334 | 0.005  | 0.04682 | 0.0003 | 522  | 18 | 322  | 4 | 295  | 2  |
| TC-01-84 | 0.96782 | 0.15942 | 0.0003 | 10.0487 | 0.0529 | 0.45702 | 0.0024 | 2450 | 4  | 2439 | 5 | 2426 | 11 |
| TC-01-85 | 0.91756 | 0.05177 | 0.001  | 0.30744 | 0.0064 | 0.04306 | 0.0003 | 275  | 35 | 272  | 5 | 272  | 2  |
| TC-01-86 | 1.0209  | 0.05166 | 0.0002 | 0.27168 | 0.0017 | 0.03814 | 0.0002 | 270  | 7  | 244  | 1 | 241  | 1  |
| TC-01-87 | 1.04168 | 0.05237 | 0.0002 | 0.2838  | 0.0024 | 0.03931 | 0.0003 | 301  | 9  | 254  | 2 | 249  | 2  |
| TC-01-88 | 1.82917 | 0.05668 | 0.0007 | 0.30361 | 0.006  | 0.03859 | 0.0004 | 479  | 28 | 269  | 5 | 244  | 2  |
| TC-01-89 | 0.81173 | 0.05392 | 0.0009 | 0.37964 | 0.0061 | 0.05107 | 0.0003 | 368  | 25 | 327  | 4 | 321  | 2  |
| TC-01-90 | 1.17825 | 0.05221 | 0.0006 | 0.28188 | 0.0031 | 0.03915 | 0.0002 | 295  | 18 | 252  | 2 | 248  | 1  |
| 91500    | 0.35067 | 0.07505 | 0.0002 | 1.85392 | 0.0096 | 0.17911 | 0.0009 | 1070 | 6  | 1065 | 3 | 1062 | 5  |
| 91500    | 0.34325 | 0.07471 | 0.0002 | 1.84648 | 0.0087 | 0.17923 | 0.0007 | 1061 | 40 | 1062 | 3 | 1063 | 4  |
| GJ       | 0.02855 | 0.06008 | 0.0002 | 0.82182 | 0.0037 | 0.09917 | 0.0004 | 606  | 1  | 609  | 2 | 610  | 2  |
| GJ       | 0.03099 | 0.06005 | 0.0002 | 0.82101 | 0.0035 | 0.09913 | 0.0004 | 606  | 6  | 609  | 2 | 609  | 2  |
| TC-01-91 | 0.53147 | 0.05067 | 0.0011 | 0.26888 | 0.0055 | 0.03848 | 0.0003 | 226  | 52 | 242  | 4 | 243  | 2  |
| TC-01-92 | 1.0251  | 0.05177 | 0.0004 | 0.26873 | 0.0024 | 0.03765 | 0.0003 | 275  | 9  | 242  | 2 | 238  | 2  |

|           |         |         |        |         |        |         |        |      |     |      |    |      |    |
|-----------|---------|---------|--------|---------|--------|---------|--------|------|-----|------|----|------|----|
| TC-01-93  | 1.0477  | 0.05325 | 0.0005 | 0.34191 | 0.0033 | 0.04657 | 0.0002 | 340  | 13  | 299  | 2  | 293  | 1  |
| TC-01-94  | 0.98577 | 0.05146 | 0.0004 | 0.26531 | 0.0021 | 0.03739 | 0.0002 | 262  | 10  | 239  | 2  | 237  | 1  |
| TC-01-95  | 1.86602 | 0.05217 | 0.0007 | 0.27074 | 0.0034 | 0.03763 | 0.0002 | 293  | 20  | 243  | 3  | 238  | 1  |
| TC-01-96  | 1.25619 | 0.05104 | 0.0019 | 0.28558 | 0.0106 | 0.04058 | 0.0004 | 243  | 90  | 255  | 8  | 256  | 2  |
| TC-01-97  | 0.91214 | 0.05139 | 0.0016 | 0.27436 | 0.0081 | 0.03872 | 0.0003 | 258  | 72  | 246  | 6  | 245  | 2  |
| TC-01-98  | 1.23296 | 0.07209 | 0.0098 | 0.30058 | 0.0407 | 0.03024 | 0.0004 | 989  | 293 | 267  | 32 | 192  | 3  |
| TC-01-99  | 0.82277 | 0.14338 | 0.0019 | 2.64022 | 0.032  | 0.13355 | 0.0007 | 2268 | 23  | 1312 | 9  | 808  | 4  |
| TC-01-100 | 0.91407 | 0.06089 | 0.0017 | 0.31928 | 0.0089 | 0.03803 | 0.0002 | 636  | 62  | 281  | 7  | 241  | 1  |
| 91500     | 0.331   | 0.07497 | 0.0003 | 1.8518  | 0.0098 | 0.17909 | 0.0007 | 1133 | 7   | 1064 | 3  | 1062 | 4  |
| 91500     | 0.35897 | 0.07467 | 0.0002 | 1.84633 | 0.0101 | 0.17929 | 0.0009 | 1061 | 6   | 1062 | 4  | 1063 | 5  |
| 91500     | 0.35204 | 0.07499 | 0.0002 | 1.85246 | 0.0085 | 0.17914 | 0.0007 | 1133 | 6   | 1064 | 3  | 1062 | 4  |
| GJ        | 0.02937 | 0.06008 | 0.0002 | 0.83287 | 0.0055 | 0.10052 | 0.0006 | 606  | 8   | 615  | 3  | 617  | 3  |
| GJ        | 0.02786 | 0.06012 | 0.0003 | 0.83536 | 0.0082 | 0.10075 | 0.0009 | 609  | 13  | 617  | 5  | 619  | 5  |
| NIST      | 0.98824 | 0.90256 | 0.0069 | 33.575  | 0.4388 | 0.26974 | 0.0031 |      |     | 3598 | 13 | 1539 | 16 |

---

**TC-02, gray-green tuffaceous sandstone**

---

|       |         |         |        |         |        |         |        |      |   |      |   |      |   |
|-------|---------|---------|--------|---------|--------|---------|--------|------|---|------|---|------|---|
| 91500 | 0.33294 | 0.07507 | 0.0002 | 1.85121 | 0.0093 | 0.1788  | 0.0007 | 1072 | 6 | 1064 | 3 | 1060 | 4 |
| 91500 | 0.35568 | 0.0747  | 0.0002 | 1.84415 | 0.0091 | 0.17902 | 0.0008 | 1061 | 5 | 1061 | 3 | 1062 | 4 |
| 91500 | 0.35305 | 0.07487 | 0.0002 | 1.85524 | 0.0088 | 0.17968 | 0.0007 | 1065 | 4 | 1065 | 3 | 1065 | 4 |

|          |         |         |        |         |        |         |        |      |    |      |    |      |    |
|----------|---------|---------|--------|---------|--------|---------|--------|------|----|------|----|------|----|
| GJ       | 0.02957 | 0.06002 | 0.0001 | 0.83231 | 0.0034 | 0.10056 | 0.0004 | 606  | 6  | 615  | 2  | 618  | 2  |
| GJ       | 0.02806 | 0.06009 | 0.0001 | 0.83326 | 0.0035 | 0.10055 | 0.0004 | 606  | 1  | 615  | 2  | 618  | 2  |
| NIST     | 0.99312 | 0.90173 | 0.0015 | 33.5306 | 0.1209 | 0.26965 | 0.0009 |      |    | 3596 | 4  | 1539 | 5  |
| TC-02-1  | 0.80336 | 0.05129 | 0.0002 | 0.26579 | 0.0018 | 0.03757 | 0.0002 | 254  | 7  | 239  | 1  | 238  | 1  |
| TC-02-2  | 1.05289 | 0.15386 | 0.0004 | 4.95855 | 0.0206 | 0.23369 | 0.0008 | 2389 | 3  | 1812 | 4  | 1354 | 4  |
| TC-02-3  | 0.49028 | 0.05159 | 0.0002 | 0.2679  | 0.0016 | 0.03766 | 0.0002 | 267  | 6  | 241  | 1  | 238  | 1  |
| TC-02-4  | 0.55871 | 0.105   | 0.0017 | 4.40766 | 0.059  | 0.30445 | 0.0027 | 1714 | 30 | 1714 | 11 | 1713 | 13 |
| TC-02-5  | 0.96037 | 0.05321 | 0.0004 | 0.28011 | 0.0023 | 0.03817 | 0.0002 | 338  | 12 | 251  | 2  | 242  | 1  |
| TC-02-6  | 0.6749  | 0.10739 | 0.0015 | 4.34054 | 0.0521 | 0.29315 | 0.0021 | 1756 | 26 | 1701 | 10 | 1657 | 10 |
| TC-02-7  | 0.82493 | 0.05245 | 0.0003 | 0.33253 | 0.0022 | 0.04599 | 0.0003 | 305  | 7  | 291  | 2  | 290  | 2  |
| TC-02-8  | 0.80397 | 0.05211 | 0.0002 | 0.26974 | 0.0017 | 0.03753 | 0.0002 | 290  | 6  | 242  | 1  | 238  | 1  |
| TC-02-9  | 1.12169 | 0.05203 | 0.0003 | 0.26867 | 0.002  | 0.03745 | 0.0002 | 287  | 9  | 242  | 2  | 237  | 1  |
| TC-02-10 | 1.24707 | 0.05228 | 0.0007 | 0.27208 | 0.0043 | 0.03774 | 0.0003 | 298  | 23 | 244  | 3  | 239  | 2  |
| TC-02-11 | 0.52561 | 0.05222 | 0.0008 | 0.29644 | 0.0043 | 0.04117 | 0.0003 | 295  | 37 | 264  | 3  | 260  | 2  |
| TC-02-12 | 0.83069 | 0.05492 | 0.0008 | 0.2846  | 0.0045 | 0.03755 | 0.0002 | 409  | 27 | 254  | 4  | 238  | 1  |
| TC-02-13 | 0.43635 | 0.11427 | 0.0002 | 5.09848 | 0.038  | 0.32359 | 0.0025 | 1868 | 6  | 1836 | 6  | 1807 | 12 |
| TC-02-14 | 0.67332 | 0.10712 | 0.0002 | 4.56389 | 0.0268 | 0.30897 | 0.0017 | 1751 | 5  | 1743 | 5  | 1736 | 8  |
| TC-02-15 | 1.3291  | 0.05458 | 0.0002 | 0.2825  | 0.0014 | 0.03756 | 0.0002 | 395  | 5  | 253  | 1  | 238  | 1  |

|          |         |         |        |         |        |         |        |      |    |      |   |      |    |
|----------|---------|---------|--------|---------|--------|---------|--------|------|----|------|---|------|----|
| 91500    | 0.34449 | 0.0748  | 0.0002 | 1.85563 | 0.0094 | 0.17987 | 0.0007 | 1065 | 38 | 1065 | 3 | 1066 | 4  |
| 91500    | 0.34938 | 0.07496 | 0.0002 | 1.84477 | 0.0093 | 0.17847 | 0.0007 | 1133 | 6  | 1062 | 3 | 1059 | 4  |
| GJ       | 0.02735 | 0.05998 | 0.0001 | 0.82627 | 0.0046 | 0.0999  | 0.0005 | 611  | 6  | 612  | 3 | 614  | 3  |
| GJ       | 0.03309 | 0.06018 | 0.0001 | 0.82855 | 0.0034 | 0.09985 | 0.0003 | 609  | 6  | 613  | 2 | 614  | 2  |
| TC-02-16 | 0.35891 | 0.17942 | 0.0004 | 12.3479 | 0.0599 | 0.49907 | 0.0023 | 2648 | 4  | 2631 | 5 | 2610 | 10 |
| TC-02-17 | 0.46543 | 0.09245 | 0.0008 | 0.89785 | 0.0093 | 0.07045 | 0.0006 | 1477 | 9  | 651  | 5 | 439  | 4  |
| TC-02-18 | 0.88913 | 0.05236 | 0.0005 | 0.33783 | 0.0032 | 0.04682 | 0.0003 | 301  | 11 | 296  | 2 | 295  | 2  |
| TC-02-19 | 0.97485 | 0.05348 | 0.0005 | 0.283   | 0.0026 | 0.03843 | 0.0002 | 349  | 11 | 253  | 2 | 243  | 1  |
| TC-02-20 | 0.36359 | 0.0515  | 0.0007 | 0.26587 | 0.0031 | 0.03744 | 0.0002 | 263  | 31 | 239  | 2 | 237  | 1  |
| TC-02-21 | 0.61372 | 0.16412 | 0.0003 | 10.269  | 0.0507 | 0.45369 | 0.0020 | 2499 | 4  | 2459 | 5 | 2412 | 9  |
| TC-02-22 | 1.00738 | 0.1044  | 0.0002 | 4.37998 | 0.0222 | 0.30428 | 0.0015 | 1704 | 4  | 1709 | 4 | 1712 | 7  |
| TC-02-23 | 0.94662 | 0.10802 | 0.0002 | 4.83946 | 0.0261 | 0.32496 | 0.0018 | 1766 | 5  | 1792 | 5 | 1814 | 9  |
| TC-02-24 | 0.74002 | 0.05131 | 0.0002 | 0.26536 | 0.0017 | 0.03751 | 0.0002 | 255  | 7  | 239  | 1 | 237  | 1  |
| TC-02-25 | 0.68653 | 0.05204 | 0.0002 | 0.30058 | 0.0014 | 0.0419  | 0.0002 | 287  | 5  | 267  | 1 | 265  | 1  |
| TC-02-26 | 1.35716 | 0.05268 | 0.0005 | 0.29459 | 0.0046 | 0.04056 | 0.0006 | 315  | 16 | 262  | 4 | 256  | 3  |
| TC-02-27 | 0.58499 | 0.10416 | 0.0003 | 4.34018 | 0.0262 | 0.30217 | 0.0017 | 1700 | 5  | 1701 | 5 | 1702 | 8  |
| TC-02-28 | 1.08872 | 0.11152 | 0.0003 | 4.97428 | 0.0319 | 0.32339 | 0.0019 | 1824 | 5  | 1815 | 5 | 1806 | 9  |
| TC-02-29 | 0.3929  | 0.05138 | 0.0002 | 0.28573 | 0.0018 | 0.04033 | 0.0002 | 258  | 7  | 255  | 1 | 255  | 1  |

|          |         |         |        |         |        |         |        |      |    |      |    |      |    |
|----------|---------|---------|--------|---------|--------|---------|--------|------|----|------|----|------|----|
| TC-02-30 | 0.92644 | 0.05208 | 0.0003 | 0.3457  | 0.0038 | 0.04813 | 0.0005 | 289  | 11 | 301  | 3  | 303  | 3  |
| 91500    | 0.33419 | 0.07493 | 0.0003 | 1.85286 | 0.0096 | 0.17931 | 0.0007 | 1066 | 6  | 1064 | 3  | 1063 | 4  |
| 91500    | 0.36066 | 0.07483 | 0.0002 | 1.84754 | 0.0096 | 0.17903 | 0.0008 | 1065 | 6  | 1063 | 3  | 1062 | 4  |
| GJ       | 0.02807 | 0.05958 | 0.0002 | 0.81808 | 0.0042 | 0.09957 | 0.0005 | 587  | 6  | 607  | 2  | 612  | 3  |
| GJ       | 0.03302 | 0.05981 | 0.0001 | 0.80993 | 0.0037 | 0.0982  | 0.0004 | 598  | 10 | 602  | 2  | 604  | 2  |
| TC-02-31 | 0.79694 | 0.05272 | 0.0017 | 0.27613 | 0.0084 | 0.03799 | 0.0003 | 317  | 73 | 248  | 7  | 240  | 2  |
| TC-02-32 | 0.92837 | 0.10698 | 0.0004 | 4.63188 | 0.0372 | 0.3141  | 0.0025 | 1749 | 7  | 1755 | 7  | 1761 | 12 |
| TC-02-33 | 0.26738 | 0.13787 | 0.0005 | 7.82873 | 0.1186 | 0.41107 | 0.0050 | 2201 | 12 | 2212 | 14 | 2220 | 23 |
| TC-02-34 | 0.7949  | 0.0521  | 0.0003 | 0.27772 | 0.0019 | 0.03867 | 0.0002 | 290  | 7  | 249  | 1  | 245  | 1  |
| TC-02-35 | 1.05464 | 0.05323 | 0.0003 | 0.32798 | 0.0025 | 0.0447  | 0.0003 | 339  | 8  | 288  | 2  | 282  | 2  |
| TC-02-36 | 1.30552 | 0.1079  | 0.003  | 4.35963 | 0.1151 | 0.29303 | 0.0027 | 1764 | 52 | 1705 | 22 | 1657 | 13 |
| TC-02-37 | 0.71311 | 0.11226 | 0.0003 | 4.92844 | 0.0383 | 0.31834 | 0.0023 | 1836 | 6  | 1807 | 7  | 1782 | 11 |
| TC-02-38 | 0.6802  | 0.05215 | 0.0003 | 0.27639 | 0.0036 | 0.03843 | 0.0004 | 292  | 13 | 248  | 3  | 243  | 3  |
| TC-02-39 | 0.81876 | 0.11578 | 0.0017 | 5.23399 | 0.068  | 0.32786 | 0.0021 | 1892 | 27 | 1858 | 11 | 1828 | 10 |
| TC-02-40 | 0.56047 | 0.10503 | 0.0016 | 4.37066 | 0.0576 | 0.30181 | 0.0024 | 1715 | 29 | 1707 | 11 | 1700 | 12 |
| TC-02-41 | 1.71003 | 0.0514  | 0.0005 | 0.26564 | 0.0034 | 0.03745 | 0.0003 | 259  | 18 | 239  | 3  | 237  | 2  |
| TC-02-42 | 0.79398 | 0.05196 | 0.0004 | 0.27384 | 0.0029 | 0.03823 | 0.0004 | 284  | 11 | 246  | 2  | 242  | 2  |
| TC-02-43 | 0.71519 | 0.05248 | 0.0006 | 0.28011 | 0.0035 | 0.03873 | 0.0003 | 306  | 15 | 251  | 3  | 245  | 2  |



|          |         |         |        |         |        |         |        |      |    |      |    |      |    |
|----------|---------|---------|--------|---------|--------|---------|--------|------|----|------|----|------|----|
| TC-02-44 | 0.67297 | 0.10652 | 0.0005 | 4.80949 | 0.0531 | 0.32744 | 0.0033 | 1741 | 9  | 1787 | 9  | 1826 | 16 |
| TC-02-45 | 0.45879 | 0.05276 | 0.0003 | 0.33483 | 0.0036 | 0.04605 | 0.0005 | 318  | 11 | 293  | 3  | 290  | 3  |
| 91500    | 0.33338 | 0.07472 | 0.0005 | 1.85022 | 0.0181 | 0.17959 | 0.0012 | 1061 | 10 | 1064 | 6  | 1065 | 6  |
| 91500    | 0.36161 | 0.07504 | 0.0005 | 1.85018 | 0.0174 | 0.17875 | 0.0011 | 1069 | 13 | 1063 | 6  | 1060 | 6  |
| GJ       | 0.03339 | 0.06027 | 0.0002 | 0.80663 | 0.0052 | 0.09706 | 0.0005 | 613  | 7  | 601  | 3  | 597  | 3  |
| GJ       | 0.02772 | 0.06016 | 0.0002 | 0.80156 | 0.0051 | 0.09662 | 0.0005 | 609  | 3  | 598  | 3  | 595  | 3  |
| TC-02-46 | 0.40169 | 0.164   | 0.0006 | 9.45364 | 0.0721 | 0.418   | 0.0027 | 2497 | 6  | 2383 | 7  | 2251 | 12 |
| TC-02-47 | 1.32372 | 0.05288 | 0.0008 | 0.34506 | 0.0048 | 0.04736 | 0.0004 | 324  | 18 | 301  | 4  | 298  | 2  |
| TC-02-48 | 0.89328 | 0.05199 | 0.0006 | 0.26955 | 0.0036 | 0.0376  | 0.0003 | 285  | 18 | 242  | 3  | 238  | 2  |
| TC-02-49 | 0.88653 | 0.05163 | 0.0005 | 0.28877 | 0.0026 | 0.04058 | 0.0003 | 269  | 10 | 258  | 2  | 256  | 2  |
| TC-02-50 | 1.12826 | 0.05146 | 0.0003 | 0.26545 | 0.0026 | 0.03743 | 0.0004 | 262  | 10 | 239  | 2  | 237  | 2  |
| TC-02-51 | 0.47059 | 0.05273 | 0.0003 | 0.34104 | 0.0033 | 0.04692 | 0.0004 | 317  | 10 | 298  | 3  | 296  | 2  |
| TC-02-52 | 0.92545 | 0.05231 | 0.0008 | 0.27422 | 0.0043 | 0.03803 | 0.0003 | 299  | 23 | 246  | 3  | 241  | 2  |
| TC-02-53 | 0.76819 | 0.16914 | 0.0004 | 11.5001 | 0.1115 | 0.49302 | 0.0046 | 2549 | 7  | 2565 | 9  | 2584 | 20 |
| TC-02-54 | 1.29976 | 0.06126 | 0.0003 | 0.3109  | 0.0019 | 0.03681 | 0.0002 | 648  | 6  | 275  | 1  | 233  | 1  |
| TC-02-55 | 0.78767 | 0.05228 | 0.0004 | 0.33067 | 0.0031 | 0.04588 | 0.0002 | 298  | 12 | 290  | 2  | 289  | 2  |
| TC-02-56 | 0.6798  | 0.16954 | 0.0003 | 12.1758 | 0.1286 | 0.52079 | 0.0054 | 2553 | 8  | 2618 | 10 | 2703 | 23 |
| TC-02-57 | 0.55797 | 0.12174 | 0.0003 | 6.10376 | 0.0533 | 0.36358 | 0.0031 | 1982 | 7  | 1991 | 8  | 1999 | 15 |

|          |         |         |        |         |        |         |        |      |    |      |   |      |    |
|----------|---------|---------|--------|---------|--------|---------|--------|------|----|------|---|------|----|
| TC-02-58 | 1.12127 | 0.05197 | 0.0003 | 0.2891  | 0.0023 | 0.04039 | 0.0004 | 284  | 9  | 258  | 2 | 255  | 2  |
| TC-02-59 | 1.64925 | 0.05139 | 0.0004 | 0.28722 | 0.0022 | 0.04054 | 0.0002 | 258  | 9  | 256  | 2 | 256  | 1  |
| TC-02-60 | 0.65005 | 0.05127 | 0.0002 | 0.26507 | 0.0025 | 0.03749 | 0.0003 | 253  | 10 | 239  | 2 | 237  | 2  |
| 91500    | 0.34768 | 0.07469 | 0.0002 | 1.84913 | 0.0111 | 0.17952 | 0.0009 | 1061 | 6  | 1063 | 4 | 1064 | 5  |
| 91500    | 0.34617 | 0.07507 | 0.0003 | 1.85127 | 0.0105 | 0.17882 | 0.0007 | 1072 | 9  | 1064 | 4 | 1061 | 4  |
| GJ       | 0.02779 | 0.05978 | 0.0001 | 0.81672 | 0.0047 | 0.09905 | 0.0005 | 594  | 10 | 606  | 3 | 609  | 3  |
| GJ       | 0.03162 | 0.05982 | 0.0002 | 0.81702 | 0.0036 | 0.09905 | 0.0004 | 598  | 10 | 606  | 2 | 609  | 2  |
| TC-02-61 | 0.88782 | 0.05385 | 0.0006 | 0.30161 | 0.0033 | 0.04063 | 0.0002 | 365  | 15 | 268  | 3 | 257  | 1  |
| TC-02-62 | 1.50852 | 0.05099 | 0.0006 | 0.26822 | 0.0035 | 0.03814 | 0.0003 | 241  | 18 | 241  | 3 | 241  | 2  |
| TC-02-63 | 1.54795 | 0.05526 | 0.0003 | 0.31919 | 0.0021 | 0.04189 | 0.0001 | 423  | 9  | 281  | 2 | 265  | 1  |
| TC-02-64 | 0.69326 | 0.0528  | 0.0005 | 0.34632 | 0.0037 | 0.04762 | 0.0004 | 320  | 11 | 302  | 3 | 300  | 2  |
| TC-02-65 | 1.1563  | 0.05152 | 0.0007 | 0.27704 | 0.0034 | 0.03913 | 0.0004 | 264  | 13 | 248  | 3 | 247  | 2  |
| TC-02-66 | 1.27575 | 0.05244 | 0.0009 | 0.27481 | 0.0056 | 0.03796 | 0.0003 | 305  | 32 | 247  | 4 | 240  | 2  |
| TC-02-67 | 0.78159 | 0.05106 | 0.0005 | 0.28758 | 0.0032 | 0.04085 | 0.0003 | 244  | 15 | 257  | 3 | 258  | 2  |
| TC-02-68 | 0.83408 | 0.1066  | 0.0005 | 4.44393 | 0.0406 | 0.30225 | 0.0024 | 1742 | 7  | 1721 | 8 | 1702 | 12 |
| TC-02-69 | 0.53115 | 0.05572 | 0.0013 | 0.29008 | 0.0062 | 0.03776 | 0.0004 | 441  | 54 | 259  | 5 | 239  | 2  |
| TC-02-70 | 0.70862 | 0.05614 | 0.0013 | 0.29653 | 0.0068 | 0.03831 | 0.0002 | 458  | 53 | 264  | 5 | 242  | 1  |
| TC-02-71 | 0.25881 | 0.0508  | 0.0006 | 0.26516 | 0.003  | 0.03786 | 0.0002 | 232  | 29 | 239  | 2 | 240  | 1  |

|          |         |         |        |         |        |         |        |      |     |      |    |      |    |
|----------|---------|---------|--------|---------|--------|---------|--------|------|-----|------|----|------|----|
| TC-02-72 | 0.26181 | 0.06164 | 0.0008 | 0.68972 | 0.0077 | 0.08116 | 0.0004 | 662  | 27  | 533  | 5  | 503  | 2  |
| TC-02-73 | 0.63098 | 0.11485 | 0.0003 | 5.07736 | 0.0391 | 0.32052 | 0.0022 | 1878 | 6   | 1832 | 7  | 1792 | 11 |
| TC-02-74 | 1.2708  | 0.05186 | 0.0005 | 0.27003 | 0.0026 | 0.03779 | 0.0003 | 279  | 11  | 243  | 2  | 239  | 2  |
| TC-02-75 | 0.96508 | 0.05269 | 0.0005 | 0.35458 | 0.0029 | 0.04882 | 0.0003 | 316  | 10  | 308  | 2  | 307  | 2  |
| 91500    | 0.3497  | 0.07492 | 0.0002 | 1.85438 | 0.0112 | 0.17948 | 0.0009 | 1066 | 6   | 1065 | 4  | 1064 | 5  |
| 91500    | 0.34419 | 0.07484 | 0.0002 | 1.84602 | 0.0103 | 0.17886 | 0.0009 | 1065 | 7   | 1062 | 4  | 1061 | 5  |
| GJ       | 0.02668 | 0.05985 | 0.0001 | 0.81779 | 0.0051 | 0.09908 | 0.0006 | 598  | 8   | 607  | 3  | 609  | 3  |
| GJ       | 0.03172 | 0.05978 | 0.0002 | 0.81375 | 0.0038 | 0.09871 | 0.0004 | 594  | 10  | 605  | 2  | 607  | 2  |
| TC-02-76 | 0.85757 | 0.1067  | 0.0002 | 4.50589 | 0.0332 | 0.3061  | 0.0021 | 1744 | 6   | 1732 | 6  | 1722 | 10 |
| TC-02-77 | 0.85728 | 0.05226 | 0.0004 | 0.29096 | 0.0021 | 0.04038 | 0.0002 | 297  | 9   | 259  | 2  | 255  | 1  |
| TC-02-78 | 1.08274 | 0.05261 | 0.0022 | 0.32237 | 0.0133 | 0.04444 | 0.0005 | 312  | 99  | 284  | 10 | 280  | 3  |
| TC-02-79 | 0.37881 | 0.11272 | 0.0002 | 5.12804 | 0.0313 | 0.32989 | 0.0020 | 1844 | 5   | 1841 | 5  | 1838 | 10 |
| TC-02-80 | 1.28971 | 0.05208 | 0.0005 | 0.27392 | 0.003  | 0.03814 | 0.0002 | 289  | 17  | 246  | 2  | 241  | 1  |
| TC-02-81 | 0.74402 | 0.05198 | 0.0005 | 0.29016 | 0.0029 | 0.04048 | 0.0002 | 284  | 16  | 259  | 2  | 256  | 1  |
| TC-02-82 | 1.94217 | 0.10543 | 0.0003 | 4.12783 | 0.0167 | 0.2839  | 0.0009 | 1722 | 3   | 1660 | 3  | 1611 | 4  |
| TC-02-83 | 1.11699 | 0.05161 | 0.0005 | 0.26768 | 0.0033 | 0.0376  | 0.0003 | 268  | 14  | 241  | 3  | 238  | 2  |
| TC-02-84 | 1.21065 | 0.05236 | 0.0017 | 0.30369 | 0.0094 | 0.04207 | 0.0003 | 301  | 75  | 269  | 7  | 266  | 2  |
| TC-02-85 | 1.23895 | 0.04605 | 0.0086 | 0.24279 | 0.0448 | 0.03824 | 0.0007 |      | 318 | 221  | 37 | 242  | 4  |

|          |         |         |        |         |        |         |        |      |    |      |    |      |    |
|----------|---------|---------|--------|---------|--------|---------|--------|------|----|------|----|------|----|
| TC-02-86 | 1.4984  | 0.17025 | 0.0005 | 10.7125 | 0.057  | 0.45627 | 0.0021 | 2560 | 4  | 2499 | 5  | 2423 | 9  |
| TC-02-87 | 1.09581 | 0.05238 | 0.0003 | 0.27361 | 0.0025 | 0.0379  | 0.0003 | 302  | 9  | 246  | 2  | 240  | 2  |
| TC-02-88 | 0.81266 | 0.05242 | 0.0004 | 0.32477 | 0.0036 | 0.04493 | 0.0004 | 304  | 12 | 286  | 3  | 283  | 2  |
| TC-02-89 | 0.9711  | 0.05713 | 0.0004 | 0.36659 | 0.0033 | 0.04656 | 0.0003 | 497  | 9  | 317  | 2  | 293  | 2  |
| TC-02-90 | 0.43692 | 0.05258 | 0.0004 | 0.32271 | 0.0038 | 0.04454 | 0.0004 | 311  | 12 | 284  | 3  | 281  | 3  |
| 91500    | 0.35047 | 0.0746  | 0.0003 | 1.84649 | 0.0113 | 0.17946 | 0.0009 | 1057 | 7  | 1062 | 4  | 1064 | 5  |
| 91500    | 0.34344 | 0.07516 | 0.0003 | 1.85391 | 0.0098 | 0.17888 | 0.0007 | 1072 | 7  | 1065 | 3  | 1061 | 4  |
| GJ       | 0.02727 | 0.06033 | 0.0002 | 0.82555 | 0.0046 | 0.09922 | 0.0005 | 617  | 6  | 611  | 3  | 610  | 3  |
| GJ       | 0.03307 | 0.06004 | 0.0002 | 0.81347 | 0.0038 | 0.09826 | 0.0004 | 606  | 6  | 604  | 2  | 604  | 2  |
| TC-02-91 | 1.03771 | 0.06297 | 0.0027 | 0.53648 | 0.0227 | 0.06179 | 0.0003 | 707  | 93 | 436  | 15 | 387  | 2  |
| TC-02-92 | 1.03248 | 0.05803 | 0.0026 | 0.30241 | 0.0128 | 0.0378  | 0.0005 | 531  | 99 | 268  | 10 | 239  | 3  |
| TC-02-93 | 1.00115 | 0.05253 | 0.0004 | 0.33902 | 0.003  | 0.04681 | 0.0003 | 308  | 11 | 296  | 2  | 295  | 2  |
| TC-02-94 | 1.47785 | 0.10942 | 0.0007 | 4.54461 | 0.0701 | 0.30069 | 0.0034 | 1790 | 14 | 1739 | 13 | 1695 | 17 |
| TC-02-95 | 0.53531 | 0.1691  | 0.0004 | 10.8285 | 0.0602 | 0.46427 | 0.0022 | 2549 | 4  | 2509 | 5  | 2458 | 10 |
| TC-02-96 | 1.06526 | 0.07926 | 0.0009 | 0.28015 | 0.0036 | 0.02564 | 0.0002 | 1179 | 13 | 251  | 3  | 163  | 1  |
| TC-02-97 | 1.11783 | 0.05178 | 0.0006 | 0.2676  | 0.004  | 0.03745 | 0.0003 | 276  | 22 | 241  | 3  | 237  | 2  |
| TC-02-98 | 0.77641 | 0.05174 | 0.0003 | 0.26775 | 0.002  | 0.03753 | 0.0003 | 274  | 8  | 241  | 2  | 238  | 2  |
| TC-02-99 | 0.45808 | 0.11525 | 0.0003 | 5.55394 | 0.048  | 0.34942 | 0.0030 | 1884 | 7  | 1909 | 7  | 1932 | 14 |

|           |         |         |        |         |        |         |        |      |     |      |   |      |   |
|-----------|---------|---------|--------|---------|--------|---------|--------|------|-----|------|---|------|---|
| TC-02-100 | 1.07014 | 0.05162 | 0.0018 | 0.26773 | 0.009  | 0.03762 | 0.0003 | 269  | 81  | 241  | 7 | 238  | 2 |
| 91500     | 0.33431 | 0.07523 | 0.0003 | 1.86179 | 0.0103 | 0.17945 | 0.0009 | 1076 | -26 | 1068 | 4 | 1064 | 5 |
| 91500     | 0.35677 | 0.07469 | 0.0003 | 1.84117 | 0.0098 | 0.17875 | 0.0008 | 1061 | 40  | 1060 | 4 | 1060 | 4 |
| 91500     | 0.35047 | 0.07472 | 0.0003 | 1.84764 | 0.0102 | 0.17932 | 0.0008 | 1061 | 8   | 1063 | 4 | 1063 | 4 |
| GJ        | 0.02746 | 0.06014 | 0.0003 | 0.82106 | 0.0064 | 0.09897 | 0.0007 | 609  | 11  | 609  | 4 | 608  | 4 |
| GJ        | 0.03256 | 0.06003 | 0.0005 | 0.81061 | 0.0086 | 0.09791 | 0.0009 | 606  | 17  | 603  | 5 | 602  | 5 |
| NIST      | 0.78823 | 0.89823 | 0.0225 | 0.14755 | 20.068 | 0.00119 | 0.1572 |      |     | 140  |   | 8    |   |

---
